# Supplementary material for: KEAP1 deficiency drives glucose dependency and sensitizes lung cancer cells and tumors to GLUT inhibition
Source: PubMed Central journal article supplement — iScience. 2021 May 25;24(6):102649. doi: 10.1016/j.isci.2021.102649 (PMC8193145; doi:10.1016/j.isci.2021.102649), 2021-05-25
Supplement: mmc1.pdf [file mmc1.pdf]

iScience, Volume 24

## Supplemental information

### ***KEAP1* deficiency drives glucose dependency and sensitizes lung cancer cells and tumors to GLUT inhibition**

**Pranavi Koppula, Kellen Olszewski, Yilei Zhang, Lavanya Kondiparthi, Xiaoguang Liu, Guang Lei, Molina Das, Bingliang Fang, Masha V. Poyurovsky, and Boyi Gan**

# Supplementary Figure 1, Related to Figure 1

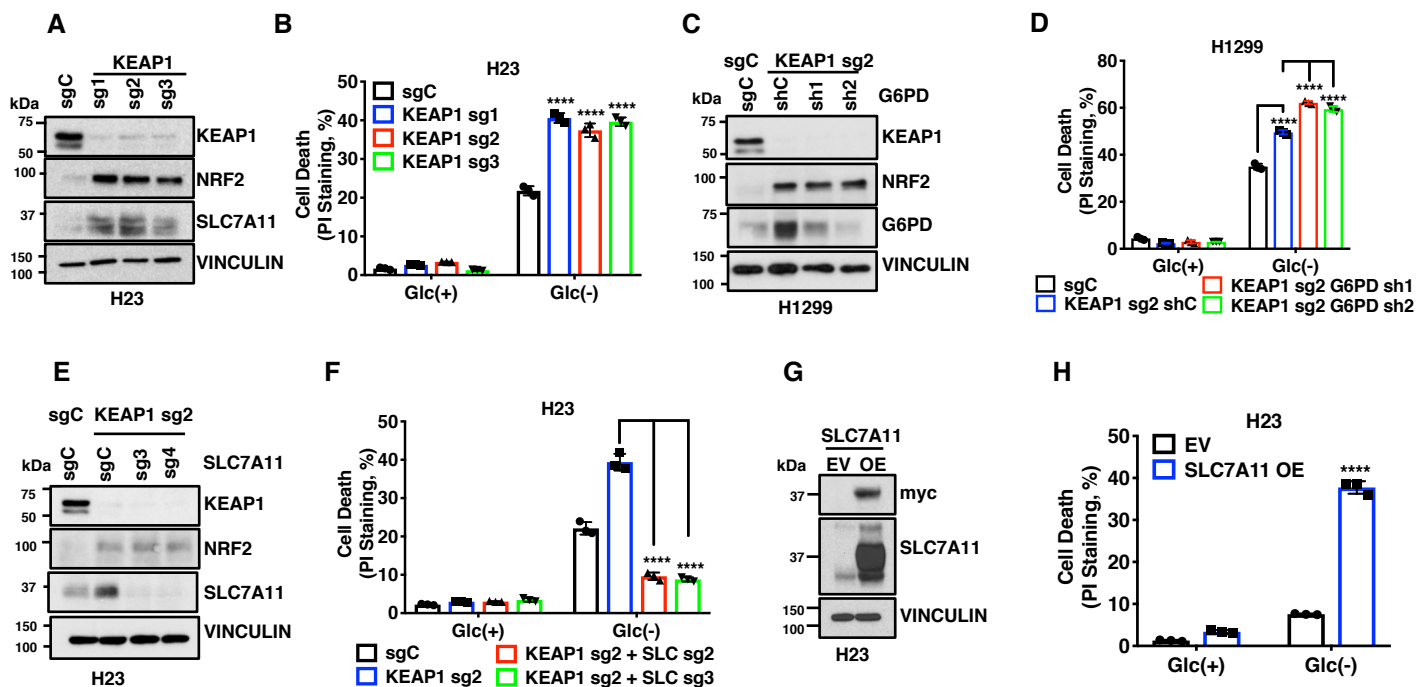

## Supplementary Figure 1. KEAP1 deficiency promotes glucose dependency in lung cancer cells mainly through SLC7A11.

A, Western blotting analysis of KEAP1, NRF2, SLC7A11 protein levels in the control (sgC) and KEAP1 knockout (sg1/2/3) H23 cells. Vinculin is used as a loading control. B, Cell death in KEAP1 knockout H23 cells upon glucose withdrawal was analyzed by PI staining. C, Western blotting analysis of KEAP1, NRF2, G6PD protein levels in G6PD knockdown in KEAP1 knockout H1299 cells. D, Cell death upon glucose withdrawal was analyzed by PI staining in KEAP1 knockout H1299 cells with G6PD knocked down. E, Western blotting analysis of KEAP1, NRF2, SLC7A11 protein levels in SLC7A11-KEAP1 double knockout H23 cells. F, Cell death in SLC7A11-KEAP1 double knockout H23 cells upon glucose withdrawal was analyzed by PI staining. G, SLC7A11 protein levels in SLC7A11-overexpressing H23 cells. EV, empty vector, OE, SLC7A11 overexpressing. H, cell death in SLC7A11-overexpressing H123 cells upon glucose withdrawal was analyzed by PI staining. Data are represented as mean  $\pm$  SD; n=3. \*\*,  $p < 0.01$ ; \*\*\*,  $p < 0.001$ ; \*\*\*\*,  $p < 0.0001$

## Supplementary Figure 2, Related to Figure 2

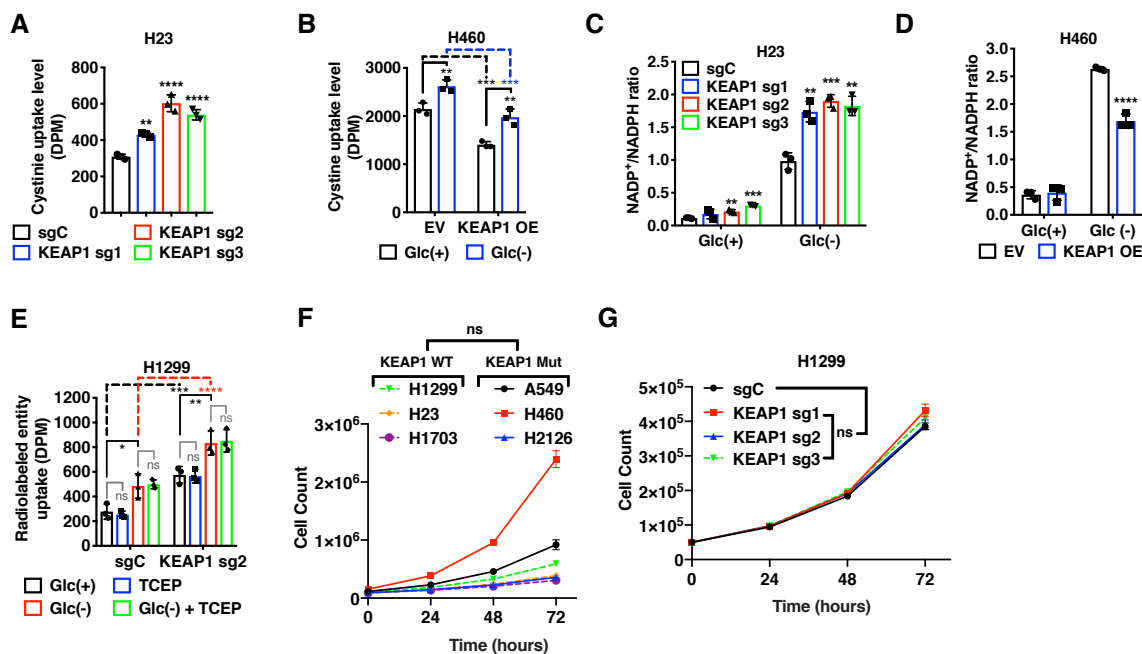

### Supplementary Figure 2. Glucose dependency of KEAP1 deficient cells is partly due to SLC7A11 mediated increased cystine uptake mediated NADPH consumption.

A, Cystine uptake levels in KEAP1 knockout H23 cells upon control (Glc(+)) and glucose starvation (Glc(-)) conditions. B, Cystine uptake levels in KEAP1 overexpressing H460 cells upon control (Glc(+)) and glucose starvation (Glc(-)) conditions. C, NADP<sup>+</sup>/NADPH KEAP1 knockout H23 cells cultured with glucose (Glc(+)) or without glucose (Glc(-)) for 24 h. D, NADP<sup>+</sup>/NADPH ratios in control and KEAP1 overexpressing H460 cell lines upon glucose starvation. E, Cystine uptake levels in different KEAP1 knockout H1299 cells treated with glucose starvation and TCEP supplementation. F, Cell proliferation rates of NSCLC cell lines carrying WT KEAP1 (H1299, H23, H1703) or mut KEAP1 (A549, H460, H2126). G, Cell proliferation rates of KEAP1 knockout H1299 cells. Data are represented as mean  $\pm$  SD; n=3. \*\*, p < 0.01; \*\*\*, p < 0.001; \*\*\*\*, p < 0.0001.

### Supplementary Figure 3, Related to Figure 3

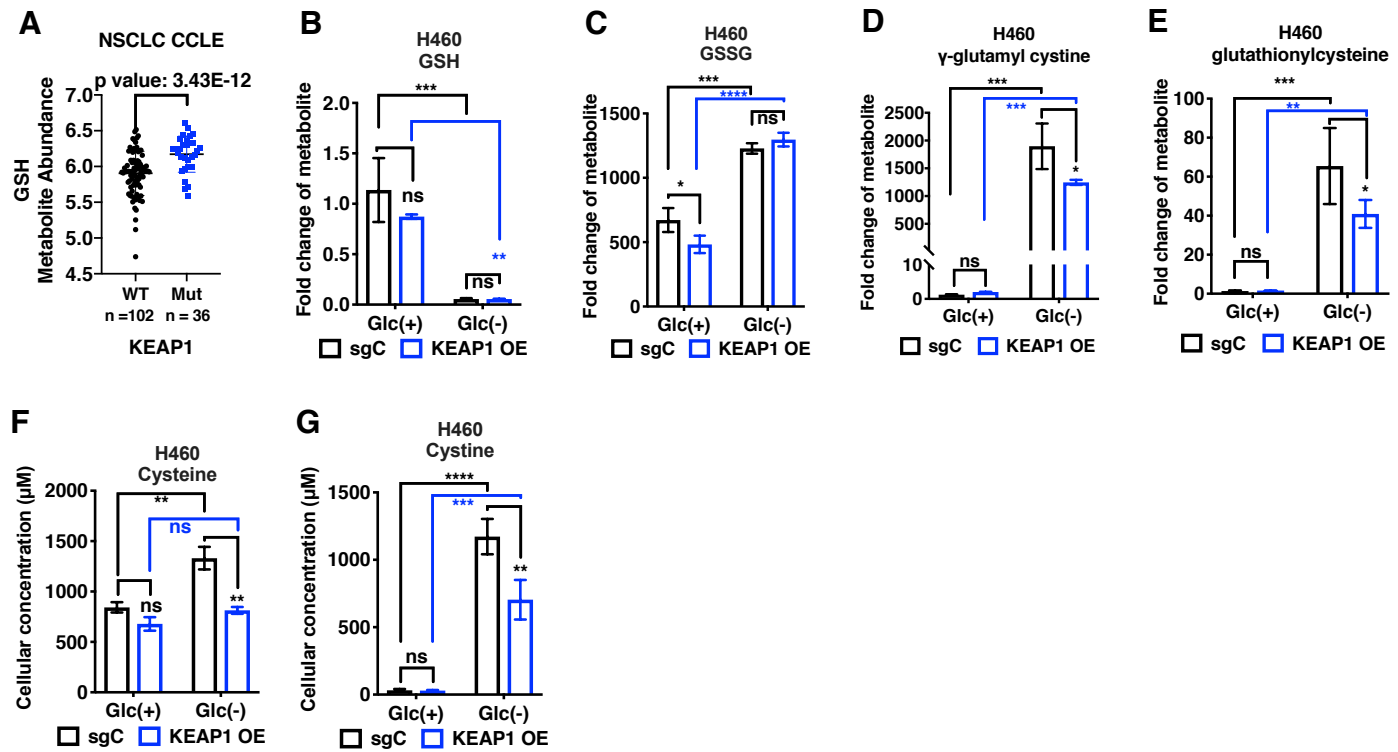

### Supplementary Figure 3. KEAP1 deletion in lung cancer cells leads to buildup of disulfide

**molecules upon glucose starvation.** A, Correlation analysis of glutathione (GSH) metabolite abundance with KEAP1 mutation status of NSCLC cell lines in the CCLE database. B-G, The concentrations or relative fold changes of glutathione (GSH; B), oxidized glutathione (GSSG; C),  $\gamma$ -glutamylcystine (D), glutathionylcystine (E), Cysteine (F), and Cystine (G) in *KEAP1* overexpressing H460 cells upon glucose starvation. Data are represented as mean  $\pm$  SD; n=3. \*, p < 0.05; \*\*, p < 0.01; \*\*\*, p < 0.001; \*\*\*\*, p < 0.0001.

Supplementary Figure 4, Related to Figure 3

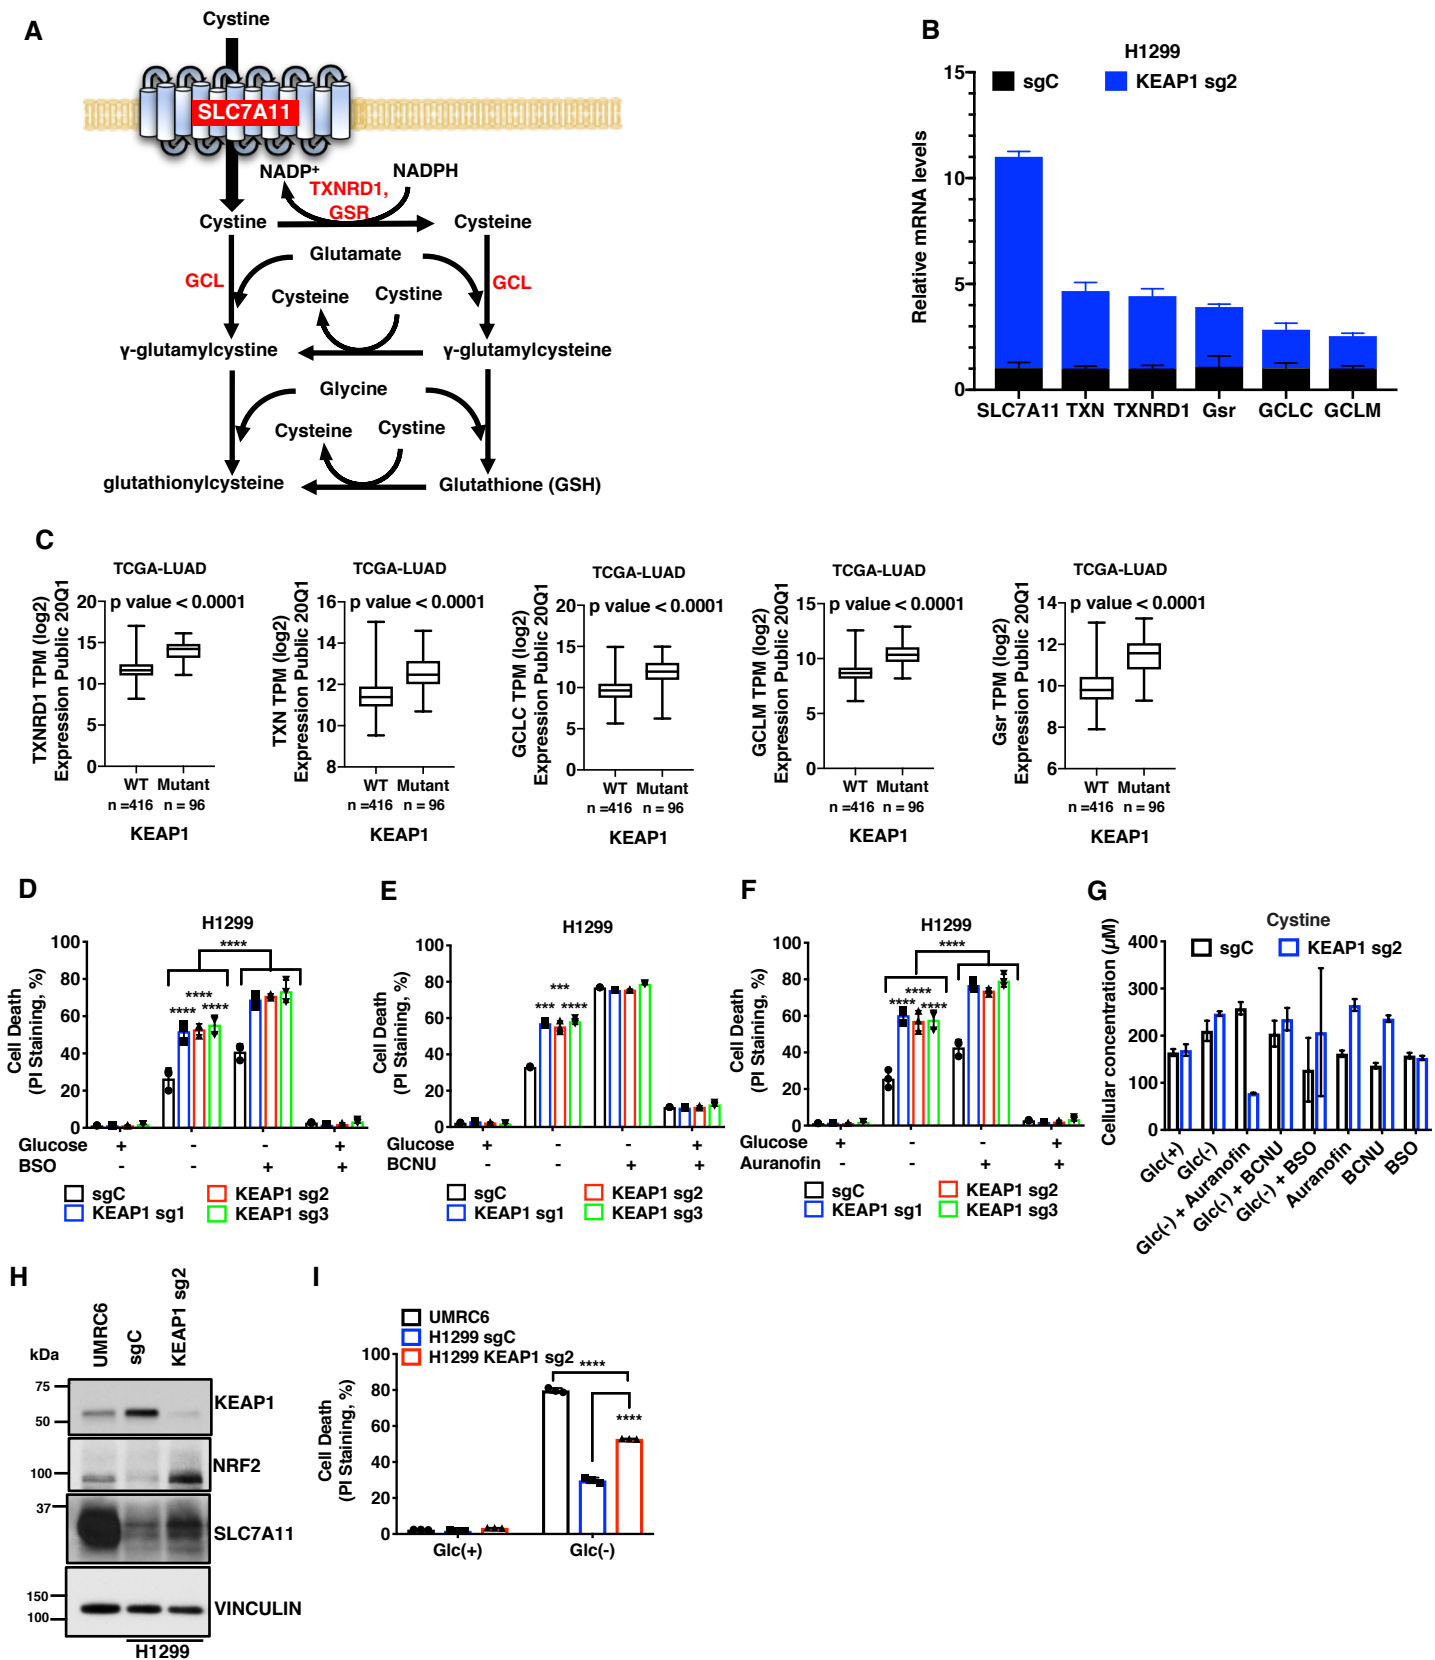

#### **Supplementary Figure 4. KEAP1-NRF2 axis supports disulfide buildup upon glucose**

**starvation.** A, Schematic representation of disulfide stress pathways in KEAP1 KO cells regulated by NRF2 target genes including glutamate-cysteine ligase (GCL, the rate-limiting enzyme in GSH biosynthesis which consists of GCLM and GCLC), glutathione reductase (GSR), and thioredoxin reductase 1 (TXNRD1). B, qPCR quantification of indicated NRF2 target genes in the KEAP1 KO H1299 cells. C, Correlation analysis of indicated NRF2 target genes with KEAP1 mutation status of LUAD tumors from TCGA. Cell death analysis of H1299 KEAP1 knockout cells cultured in complete medium or glucose-free medium supplemented with buthionine sulfoximine (BSO) (D), 1,3-bis(2-chloroethyl)-1-nitrosourea (BCNU) (E), Auranofin (F) for 24 h. G, Cystine accumulation in KEAP1 KO H1299 cells treated with or without glucose along with indicated supplements for 8 hrs. H, Western blotting analysis of KEAP1, NRF2, SLC7A11 protein levels in UMRC6, H1299 (sgC) and KEAP1 knockout (sg2) cells. Vinculin is used as a loading control. I, Cell death analysis of UMRC6, H1299 (sgC) and KEAP1 knockout (sg2) cells upon glucose starvation for 24 hrs. Data are represented as mean  $\pm$  SD; n=3. \*,  $p < 0.05$ ; \*\*,  $p < 0.01$ ; \*\*\*,  $p < 0.001$ ; \*\*\*\*,  $p < 0.0001$ .

Supplementary Figure 5, Related to Figure 4

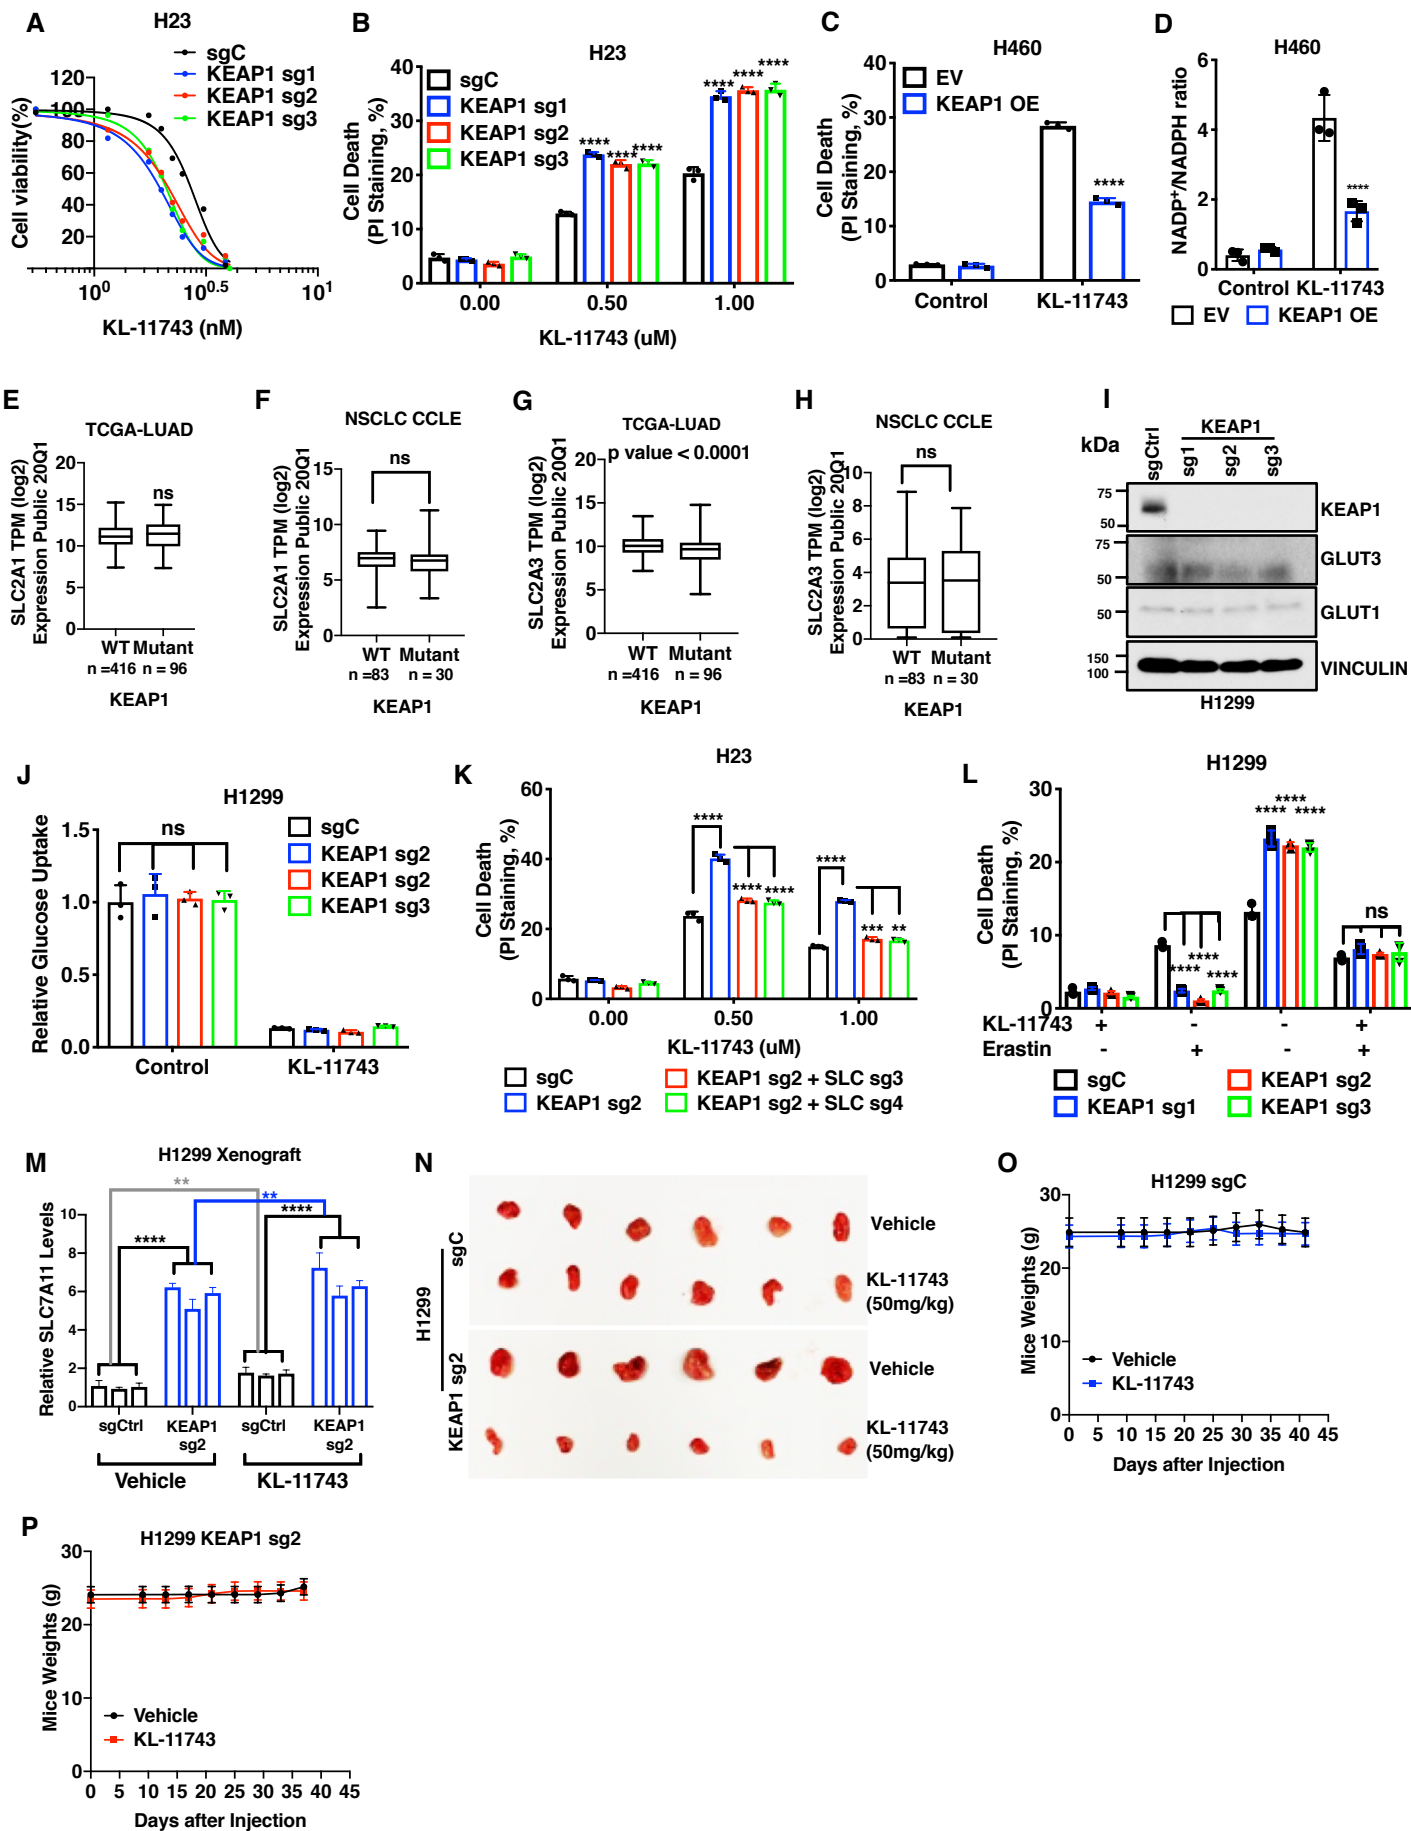

**Supplementary Figure 5. KEAP1 deficiency sensitizes lung cancer cells or lung tumors to GLUT inhibition**

**A**, Cell viability in KEAP1 KO H23 cell lines upon GLUT inhibitor (KL-11743) treatment was analyzed by CCK8 (**A**). Cell death in KEAP1 KO H1299 cells upon GLUT inhibitor treatment was measured by PI staining (**B**). **C**, Cell viability of KEAP1 overexpressing H460 cells treated with KL-11743. **D**, NADP<sup>+</sup>/NADPH ratios in control and KEAP1 overexpressing H460 cell lines upon KL-11743 treatment. Correlation analysis of SLC2A1 expression in KEAP1 WT vs mutant LUAD tumors from TCGA (**E**) and NSCLC cell lines in CCLE database (**F**). Correlation analysis of SLC2A3 expression in KEAP1 WT vs mutant LUAD tumors from TCGA (**G**) and NSCLC cell lines in CCLE database (**H**). **I**, Western blot analysis of GLUT1, GLUT3, KEAP1 protein expression in KEAP1 KO H1299 cells. Vinculin was used as loading control. **J**, Glucose uptake in KEAP1 KO H1299 cells treated with 1  $\mu$ M KL-11743. DPM, disintegrations per min. **K**, Cell death in SLC7A11-KEAP1 double KO H23 cell lines upon GLUT inhibitor (KL-11743) treatment was analyzed by PI staining. **L**, Cell death analysis of H1299 KEAP1 knockout cells cotreated with erastin and KL-11743. **M**, qPCR quantification of SLC7A11 levels in indicated xenograft tumors derived from H1299 treated with vehicle or KL-11743. **N**, **O**, **P**, Mice weights of H1299 Xenografts derived from sgC (**M**) or KEAP1 sg2 (**N**) at different time points treated with vehicle or KL-11743. Data are represented as mean  $\pm$  SD; n=3. \*\*, p < 0.01; \*\*\*, p < 0.001; \*\*\*\*, p < 0.0001.



## Supplementary Figure 6

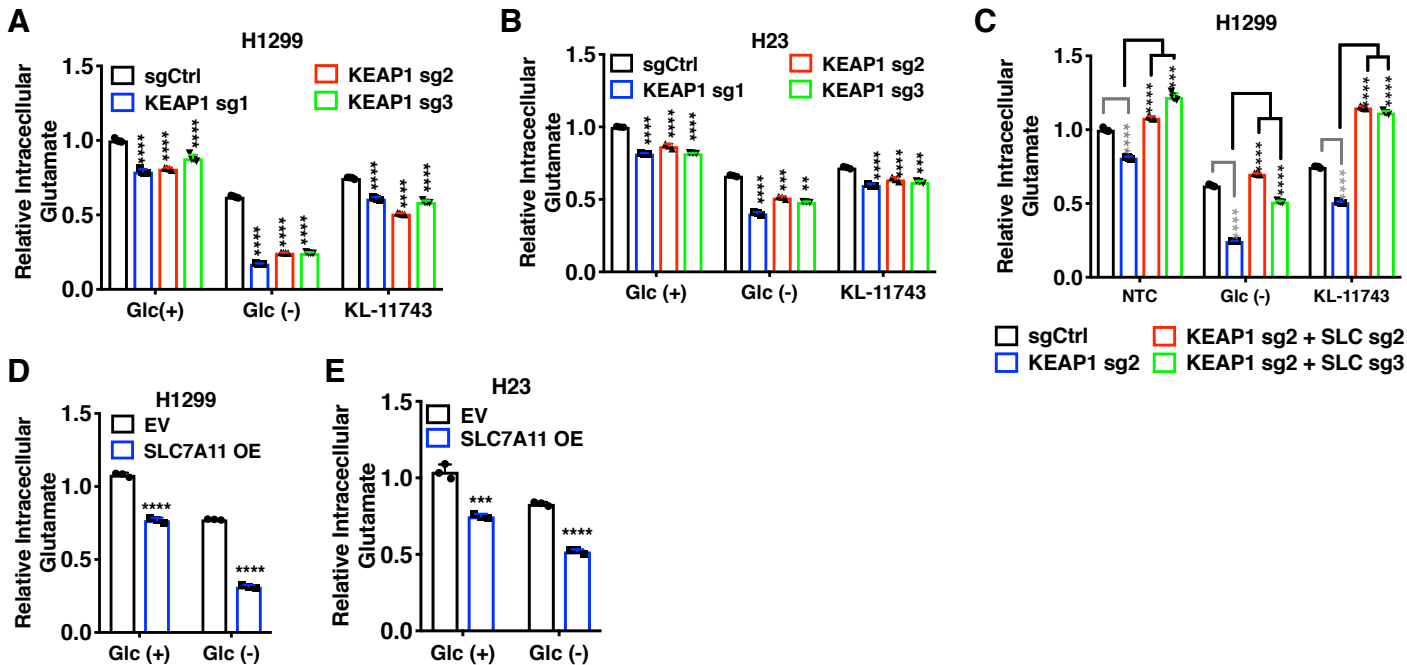

**Supplementary Figure 6. KEAP1 deficiency drives glutamate export through SLC7A11** Intracellular glutamate levels were determined after 6h of glucose (Glc) withdrawal in (A) KEAP1 knockout H1299, (B) KEAP1 knockout H23, (C) KEAP1 SLC7A11 double knockout H1299, SLC7A11 overexpressing (D) H1299 and (E) H23 cells. \*,  $p < 0.05$ ; \*\*,  $p < 0.01$ ; \*\*\*,  $p < 0.001$ ; \*\*\*\*,  $p < 0.0001$ .

Supplementary Table 1, Related to Figure 1

|        | H2126 | H460 | A549 | H1299 | H23 | H1703 |
|--------|-------|------|------|-------|-----|-------|
| KEAP1  | Mut   | Mut  | Mut  | WT    | WT  | WT    |
| TP53   | Mut   | WT   | WT   | WT    | Mut | Mut   |
| KRAS   | WT    | Mut  | Mut  | WT    | Mut | WT    |
| LKB1   | WT    | Mut  | Mut  | WT    | Mut | WT    |
| PIK3CA | WT    | Mut  | WT   | WT    | WT  | WT    |

**Table S1. KEAP1 mutation status of NSCLC cell lines** Mutation status of lung cancer genes in the lung cancer cell lines used in this study.

**Supplementary Table 2, Related to Figure 1**

| KEAP1 WT                                                         |                |                                                                  |                |                                                                  |                | KEAP1 Mut                                                        |                |
|------------------------------------------------------------------|----------------|------------------------------------------------------------------|----------------|------------------------------------------------------------------|----------------|------------------------------------------------------------------|----------------|
| SLC7A11<br>log <sub>2</sub> (TPM+1)<br>Expression<br>Public 20Q1 | Cell Line Name | SLC7A11<br>log <sub>2</sub> (TPM+1)<br>Expression<br>Public 20Q1 | Cell Line Name | SLC7A11<br>log <sub>2</sub> (TPM+1)<br>Expression<br>Public 20Q1 | Cell Line Name | SLC7A11<br>log <sub>2</sub> (TPM+1)<br>Expression<br>Public 20Q1 | Cell Line Name |
| 0.54596837                                                       | CORL23         | 2.96532255                                                       | DV90           | 4.30815698                                                       | NCIH292        | 2.207892852                                                      | NCIH661        |
| 0.63226822                                                       | HCC2429        | 3.00360224                                                       | A427           | 4.31831684                                                       | NCIH2291       | 2.454175893                                                      | NCIH23         |
| 0.90303827                                                       | NCIH2882       | 3.04264434                                                       | CORL105        | 4.32696871                                                       | RERFLCSQ1      | 2.867896464                                                      | HCC2108        |
| 0.91073266                                                       | NCIH2342       | 3.0583165                                                        | HCC2279        | 4.37573454                                                       | LOUNH91        | 3.360364277                                                      | HCC2935        |
| 1.38404981                                                       | IALM           | 3.06522762                                                       | HCC1195        | 4.42961596                                                       | SKLU1          | 3.379898164                                                      | NCIH838        |
| 1.45417589                                                       | NCIH1666       | 3.06695024                                                       | HCC4006        | 4.45088132                                                       | NCIH1437       | 3.641546029                                                      | NCIH1339       |
| 1.46988598                                                       | NCIH810        | 3.11769504                                                       | NCIH1563       | 4.52606881                                                       | NCIH2405       | 4.181897643                                                      | NCIH1915       |
| 1.51096192                                                       | NCIH2085       | 3.14077866                                                       | CALU6          | 4.6363346                                                        | NCIH2087       | 4.297191417                                                      | NCIH1435       |
| 1.65076456                                                       | NCIH1963       | 3.169925                                                         | ABC1           | 4.70873904                                                       | CALU3          | 4.510329019                                                      | BEN            |
| 1.70043972                                                       | NCIH526        | 3.22958792                                                       | NCIH1869       | 4.79960542                                                       | NCIH1703       | 4.736063628                                                      | MORCPR         |
| 1.70043972                                                       | HOP92          | 3.23419472                                                       | NCIH1650       | 4.88508623                                                       | RERFLCKJ       | 4.809414444                                                      | NCIH2030       |
| 1.85199884                                                       | COLO699        | 3.23572706                                                       | NCIH2009       | 4.99322147                                                       | NCIH1651       | 5.21023299                                                       | NCIH2172       |
| 1.87578006                                                       | NCIH650        | 3.24640809                                                       | HCC461         | 5.14159628                                                       | NCIH441        | 5.274261661                                                      | NCIH1648       |
| 1.91073266                                                       | HCC515         | 3.28983447                                                       | NCIH2347       | 5.2156786                                                        | LCLC97TM1      | 5.321567376                                                      | NCIH2126       |
| 1.95233357                                                       | NCIH2106       | 3.36457243                                                       | SW900          | 5.29939121                                                       | RERFLCAI       | 5.34091827                                                       | LUDLU1         |
| 1.96347412                                                       | NCIH1975       | 3.36737107                                                       | RERFLCAD1      | 5.47961861                                                       | HCC2814        | 5.514753498                                                      | NCIH460        |
| 2.00360224                                                       | HCC364         | 3.37573454                                                       | NCIH1155       | 5.49441561                                                       | NCIH854        | 5.756489607                                                      | NCIH2170       |
| 2.08065766                                                       | HCC827         | 3.42492209                                                       | LU99           | 5.6129422                                                        | KNS62          | 5.818134761                                                      | HCC44          |
| 2.12432814                                                       | SW1573         | 3.45680615                                                       | NCIH2444       | 5.71918344                                                       | NCIH2887       | 5.902556005                                                      | NCIH1385       |
| 2.14077866                                                       | NCIH1299       | 3.51222689                                                       | HCC1359        | 5.73470962                                                       | PC14           | 5.904724928                                                      | NCIH2110       |
| 2.23878686                                                       | NCIH522        | 3.53977919                                                       | NCIH226        | 5.73660488                                                       | EBC1           | 5.946496941                                                      | NCIH1355       |
| 2.26002566                                                       | HCC78          | 3.63691458                                                       | CAL12T         | 5.77741972                                                       | HOP62          | 5.948367232                                                      | NCIH1623       |
| 2.38128337                                                       | HCC827GR5      | 3.63807384                                                       | NCIH358        | 5.85574059                                                       | LK2            | 5.9800253                                                        | NCIH2023       |
| 2.40326772                                                       | NCIH2073       | 3.66334462                                                       | PC9            | 5.98891186                                                       | NCIH520        | 6.000225403                                                      | HCC15          |
| 2.44625623                                                       | NCIH1693       | 3.7059779                                                        | NCIH1781       | 6.02635745                                                       | LC1F           | 6.02103548                                                       | T3M10          |
| 2.46205232                                                       | NCIH1092       | 3.74523733                                                       | HCC1171        | 6.09296851                                                       | HCC95          | 6.04176865                                                       | NCIH322        |
| 2.49825087                                                       | NCIH1581       | 3.87282876                                                       | NCIH1734       | 6.10873353                                                       | HCC1438        | 6.102868054                                                      | A549           |
| 2.54349588                                                       | RERFLCAD2      | 4.02236781                                                       | LCLC103H       | 6.38973888                                                       | NCIH1373       | 6.167719199                                                      | NCIH1944       |
| 2.68706069                                                       | NCIH1568       | 4.05311134                                                       | LU65           | 6.4849437                                                        | NCIH1793       | 6.459103696                                                      | RERFLCMS       |
| 2.75915583                                                       | HCC2450        | 4.09423607                                                       | NCIH3122       | 6.50080205                                                       | HARA           | 6.736063628                                                      | NCIH1755       |
| 2.78659636                                                       | SQ1            | 4.138323                                                         | NCIH1838       | 6.74779018                                                       | SKMES1         | 6.85785662                                                       | NCIH1792       |
| 2.82984956                                                       | EPLC272H       | 4.14404637                                                       | NCIH596        | 7.06501215                                                       | NCIH2228       | 6.871597266                                                      | NCIH1573       |
| 2.85399565                                                       | NCIH3255       | 4.21023299                                                       | CALU1          |                                                                  |                | 6.891176125                                                      | NCIH2122       |
| 2.94110631                                                       | EKVX           | 4.26153082                                                       | HCC366         |                                                                  |                | 7.221103725                                                      | LXF289         |
| 2.96532255                                                       | NCIH1395       | 4.28835856                                                       | CHAGOK1        |                                                                  |                | 7.379291716                                                      | NCIH647        |

**Table S2. SLC7A11 has a positive correlation with KEAP1 mutation in NSCLC cell lines** SLC7A11 expression in KEAP1 WT and mutant NSCLC cell lines available on CCLE database.

**Supplementary Table 3, Related to Figure 4**

| Sr. No. | PDX ID       | Sensitivity to KL-11743 | SLC7A11 expression | KEAP1 | TP53  | KRAS | STK11/LKB1   | PIK3CA | NFE2L2 |
|---------|--------------|-------------------------|--------------------|-------|-------|------|--------------|--------|--------|
| 1       | TC393        | insensitive             | 58                 | WT    | WT    | WT   | WT           | WT     | WT     |
| 2       | TC551        | insensitive             | 70                 | WT    | WT    | G12C | WT           | WT     | WT     |
| 3       | <b>TC333</b> | <b>sensitive</b>        | 10876              | R601W | E273H | G12D | WT           | WT     | WT     |
| 4       | <b>TC494</b> | <b>sensitive</b>        | 9139               | N68S  | WT    | G12V | Splicing mut | WT     | WT     |
| 5       | <b>TC453</b> | <b>sensitive</b>        | 2869               | WT    | WT    | G12C | Splicing mut | WT     | WT     |

**Table S3. *KEAP1* mutant PDX derived tumors are sensitive to GLUT inhibitor** Mutation status of lung cancer genes in the PDX models used in our previous study (Liu et al. 2020).

**Supplementary Table 4**

| Sr. No. | Primer sequence         | Gene      |
|---------|-------------------------|-----------|
| 1       | ATGCAGTGGCAGTGACCTTT    | SLC7A11-F |
| 2       | GGCAACAAAGATCGGAACTG    | SLC7A11-R |
| 3       | TTTCAGGAAGCCTTGGACGCT   | TXN-F     |
| 4       | GCAACATCCTGACAGTCATCCAC | TXN-R     |
| 5       | ACGGTGATGCTGGCAATAGG    | TXNRD-F   |
| 6       | CTGGGGTGAGCTCCACCTTA    | TXNRD-R   |
| 7       | ACCCCGATGTATCACGCAGTTA  | Gsr-F     |
| 8       | TGTCAAAGTCTGCCTTCGTTGC  | Gsr-R     |
| 9       | GGCACAAGGACGTTCTCAAGT   | GCLC-F    |
| 10      | CAAAGGGTAGGATGGTTTGGG   | GCLC-R    |
| 11      | CTCATTCCGCTGTCCAGGT     | GCLM-F    |
| 12      | CCTTTGCAGATGTCTTTCCTGAA | GCLM-R    |
| 13      | CGGAACCGCTCATTGCC       | b-Actin-F |
| 14      | ACCCACACTGTGCCCATCTA    | b-Actin-R |

**Table S4. Primer sequences** RT-PCR primer sequences used in this study.
